# Supplementary material for: The Neurodevelopmental Basis of Early Childhood Disruptive Behavior: Irritable and Callous Phenotypes as Exemplars
Source: Atypon-hosted journal article supplement (doi:10.1176/appi.ajp.2017.17010045), 2017-11-17
Supplement: appi.ajp.2017.17010045.ds001.pdf [file appi.ajp.2017.17010045.ds001.pdf]

**Table S1: The Normal:Abnormal Spectrum of Irritable Behavior In Early Childhood in the MAPS Community Samples**

**In a typical week over the past month, how often did child....**

|                                                 | NEVER IN PAST MONTH |                | YES IN PAST MONTH |      |          |      |          |     |           |     | Occurs Normatively (Most Children Do->50%) | Abnormal Frequency Threshold (<5% endorse) |
|-------------------------------------------------|---------------------|----------------|-------------------|------|----------|------|----------|-----|-----------|-----|--------------------------------------------|--------------------------------------------|
|                                                 | C <sup>1</sup>      | R <sup>2</sup> | < weekly          |      | 1-3 days |      | 4-6 days |     | Daily or> |     |                                            |                                            |
|                                                 |                     |                | C                 | R    | C        | R    | C        | R   | C         | R   |                                            |                                            |
| <b>Milder, Commonly Occurring Behaviors</b>     |                     |                |                   |      |          |      |          |     |           |     |                                            |                                            |
| 1. Have a tantrum                               | 44.5                | 44.3           | 34.0              | 31.9 | 13.3     | 15.4 | 3.8      | 4.4 | 4.4       | 4.1 | Yes                                        | Daily                                      |
| 2. Have a tantrum when frustrated, angry, upset | 39.2                | 37.5           | 38.2              | 35.0 | 14.4     | 17.7 | 4.4      | 5.6 | 3.9       | 4.2 | Yes                                        | Daily                                      |
| 3. Have a tantrum to get something s/he wanted  | 41.1                | 39.5           | 35.8              | 33.1 | 14.5     | 17.4 | 4.5      | 5.2 | 4.0       | 4.9 | Yes                                        | Daily                                      |
| 4. Have a tantrum when tired, hungry, sick      | 40.1                | 38.8           | 34.8              | 33.1 | 16.9     | 18.0 | 4.6      | 6.1 | 3.6       | 4.0 | Yes                                        | Daily                                      |
| 5. Have a tantrum with parent                   | 44.5                | 46.6           | 34.9              | 31.2 | 13.4     | 14.1 | 3.6      | 4.5 | 3.6       | 3.6 | Yes                                        | Daily                                      |
| 6. Have a tantrum during daily routines         | 41.6                | 39.9           | 33.9              | 34.8 | 16.9     | 16.7 | 3.2      | 4.5 | 4.4       | 4.1 | Yes                                        | Most Days                                  |
| 7. Become frustrated easily                     | 34.8                | 32.8           | 36.2              | 34.7 | 18.8     | 20.3 | 5.2      | 5.5 | 5.0       | 6.8 | Yes                                        | Most Days                                  |
| 8. Have a "short fuse"                          | 48.2                | 44.0           | 31.3              | 31.2 | 12.7     | 15.1 | 3.9      | 4.7 | 3.9       | 5.0 | Yes                                        | Most Days                                  |
| 9. Yell angrily at someone                      | 37.3                | 35.0           | 38.6              | 37.5 | 15.9     | 17.8 | 4.3      | 5.0 | 3.8       | 4.6 | Yes                                        | Most Days                                  |
| 10. Have difficulty calming down when angry     | 47.3                | 45.2           | 33.1              | 32.1 | 12.8     | 14.8 | 3.6      | 3.7 | 3.3       | 4.2 | Yes                                        | Most Days                                  |

**Table S1: The Normal:Abnormal Spectrum of Irritable Behavior In Early Childhood in the MAPS Community Samples**

**In a typical week over the past month, how often did child....**

|                                                | NEVER IN PAST MONTH |                | YES IN PAST MONTH |      |          |      |          |     |           |     | Occurs Normatively (Most Children Do->50%) | Abnormal Frequency Threshold (<5% endorse) |
|------------------------------------------------|---------------------|----------------|-------------------|------|----------|------|----------|-----|-----------|-----|--------------------------------------------|--------------------------------------------|
|                                                | C <sup>1</sup>      | R <sup>2</sup> | < weekly          |      | 1-3 days |      | 4-6 days |     | Daily or> |     |                                            |                                            |
|                                                |                     |                | C                 | R    | C        | R    | C        | R   | C         | R   |                                            |                                            |
| <b>Uncommon, Severe Behaviors</b>              |                     |                |                   |      |          |      |          |     |           |     |                                            |                                            |
| 11. Act Irritable                              | 42.5                | 42.0           | 36.3              | 35.0 | 14.9     | 16.4 | 3.6      | 3.5 | 2.8       | 3.1 | Yes                                        | Most Days                                  |
| 12. Stamp feet or hold breath during a tantrum | 54.5                | 49.8           | 26.3              | 26.7 | 12.1     | 14.6 | 3.8      | 4.9 | 3.3       | 4.2 | No                                         | Most Days                                  |
| 13. Have tantrums >5 min.                      | 58.8                | 56.3           | 27.2              | 30.3 | 10.0     | 8.8  | 1.7      | 2.3 | 2.3       | 2.4 | No                                         | Most Days                                  |
| 14. Have a tantrum unresponsive to support     | 66.3                | 63.7           | 23.2              | 24.6 | 6.4      | 7.7  | 1.6      | 1.8 | 2.4       | 2.2 | No                                         | Most Days                                  |
| 15. Break or destroy things during a tantrum   | 71.7                | 73.3           | 19.0              | 18.3 | 5.4      | 5.6  | 1.5      | 1.4 | 2.4       | 1.4 | No                                         | Most Days                                  |
| 16. Have an explosive temper                   | 67.0                | 64.6           | 21.4              | 22.7 | 6.3      | 6.8  | 2.3      | 2.8 | 3.0       | 3.1 | No                                         | Most Days                                  |
| 17. Get extremely angry                        | 62.5                | 61.5           | 24.5              | 25.6 | 8.0      | 8.2  | 2.0      | 2.6 | 3.0       | 2.1 | No                                         | Most Days                                  |
| 18. Have tantrums until exhausted              | 74.2                | 74.2           | 16.7              | 16.8 | 5.4      | 5.4  | 1.5      | 1.3 | 2.1       | 2.2 | No                                         | Weekly                                     |
| 19. Hit, bite, kick during a tantrum           | 76.5                | 76.9           | 15.3              | 14.6 | 4.3      | 5.3  | 2.1      | 1.3 | 1.8       | 1.8 | No                                         | Weekly                                     |
| 20. Have a tantrum "out of the blue"           | 73.7                | 73.3           | 18.0              | 17.8 | 5.2      | 6.1  | 1.2      | 1.0 | 1.9       | 1.8 | No                                         | Weekly                                     |
| 21. Have a tantrum with non-parental adults    | 63.8                | 62.8           | 26.2              | 25.5 | 6.7      | 7.7  | 1.3      | 1.9 | 1.9       | 2.1 | No                                         | Weekly                                     |
| 22. Stay angry for a long time                 | 69.2                | 70.3           | 24.3              | 22.2 | 4.0      | 4.8  | 1.1      | 1.2 | 1.4       | 1.6 | No                                         | Weekly                                     |

<sup>1</sup>C=Preschool Calibration Sample N=1,490; <sup>2</sup>R=Preschool Replication Sample N=1,857

**Table S2: The Normal:Abnormal Spectrum of Low Concern for Others in Early Childhood in the MAPS Community Samples**

**In a typical week over the past month, how often did child....**

|                                                                     | NEVER IN PAST MONTH |                | YES IN PAST MONTH |      |          |     |          |     |           |     | Occurs Normatively (Most Children Do->50%) | Abnormal Frequency Threshold (<5% endorse) |
|---------------------------------------------------------------------|---------------------|----------------|-------------------|------|----------|-----|----------|-----|-----------|-----|--------------------------------------------|--------------------------------------------|
|                                                                     | C <sup>1</sup>      | R <sup>2</sup> | < weekly          |      | 1-3 days |     | 4-6 days |     | Daily or> |     |                                            |                                            |
|                                                                     |                     |                | C                 | R    | C        | R   | C        | R   | C         | R   |                                            |                                            |
| 1. Not care about other's feelings when frustrated, angry, or upset | 68.8                | 69.9           | 23.6              | 21.4 | 4.7      | 5.7 | 1.1      | 1.5 | 1.8       | 1.6 | No                                         | Weekly                                     |
| 2. Not seem to care about parents' feelings                         | 75.2                | 75.5           | 18.1              | 17.8 | 4.3      | 3.8 | 0.9      | 1.2 | 1.5       | 1.7 | No                                         | Weekly                                     |
| 3. Keep on doing something that was scaring or upsetting someone    | 64.7                | 63.6           | 23.6              | 24.6 | 8.2      | 7.8 | 1.7      | 1.9 | 1.8       | 2.2 | No                                         | Weekly                                     |
| 4. Not seem to care about other adults' feelings                    | 76.3                | 77.0           | 17.6              | 17.2 | 4.2      | 3.2 | 0.3      | 1.1 | 1.5       | 1.5 | No                                         | Weekly                                     |
| 5. Act like s/he did not care when someone was mad or upset         | 74.9                | 74.9           | 18.5              | 19.6 | 4.6      | 3.4 | 0.7      | 0.8 | 1.1       | 1.3 | No                                         | Weekly                                     |
| 6. Act like s/he did not care about pleasing other people           | 69.9                | 72.2           | 24.3              | 19.8 | 3.0      | 5.4 | 1.3      | 1.4 | 1.4       | 1.2 | No                                         | Weekly                                     |
| 7. Enjoy making others mad                                          | 80.5                | 80.4           | 13.6              | 13.7 | 4.0      | 3.6 | 0.9      | 0.8 | 0.9       | 1.5 | No                                         | Weekly                                     |
| 8. Do things to humiliate or embarrass others                       | 87.3                | 87.0           | 8.5               | 8.9  | 2.6      | 2.4 | 0.4      | 0.7 | 1.1       | 1.0 | No                                         | Weekly                                     |
| 9. Act like s/he did not care when someone felt bad or sad          | 80.3                | 80.2           | 15.7              | 15.5 | 2.8      | 2.6 | 0.6      | 0.6 | 0.6       | 1.0 | No                                         | Weekly                                     |

<sup>1</sup>C=Preschool Calibration Sample N=1,490; <sup>2</sup>R=Preschool Replication Sample N=1,857
